# Supplementary material
Source: Springer Nature journal article supplement (https://www.springermedizin.de/resource/supplementary/10194_2014_1022_MOESM1_ESM.pdf/9423396)

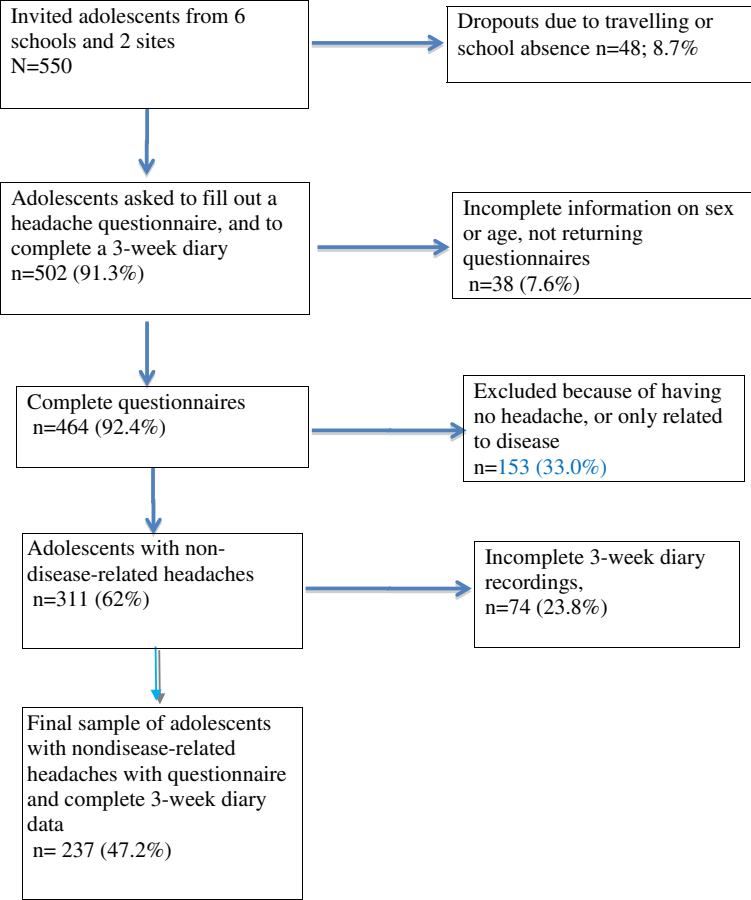

Supplement: MOESM1 [file 9423396]
